# Supplementary material
Source: Springer Nature journal article supplement (https://www.springermedizin.de/resource/supplementary/12904_2008_42_MOESM3_ESM.pdf/9517982)

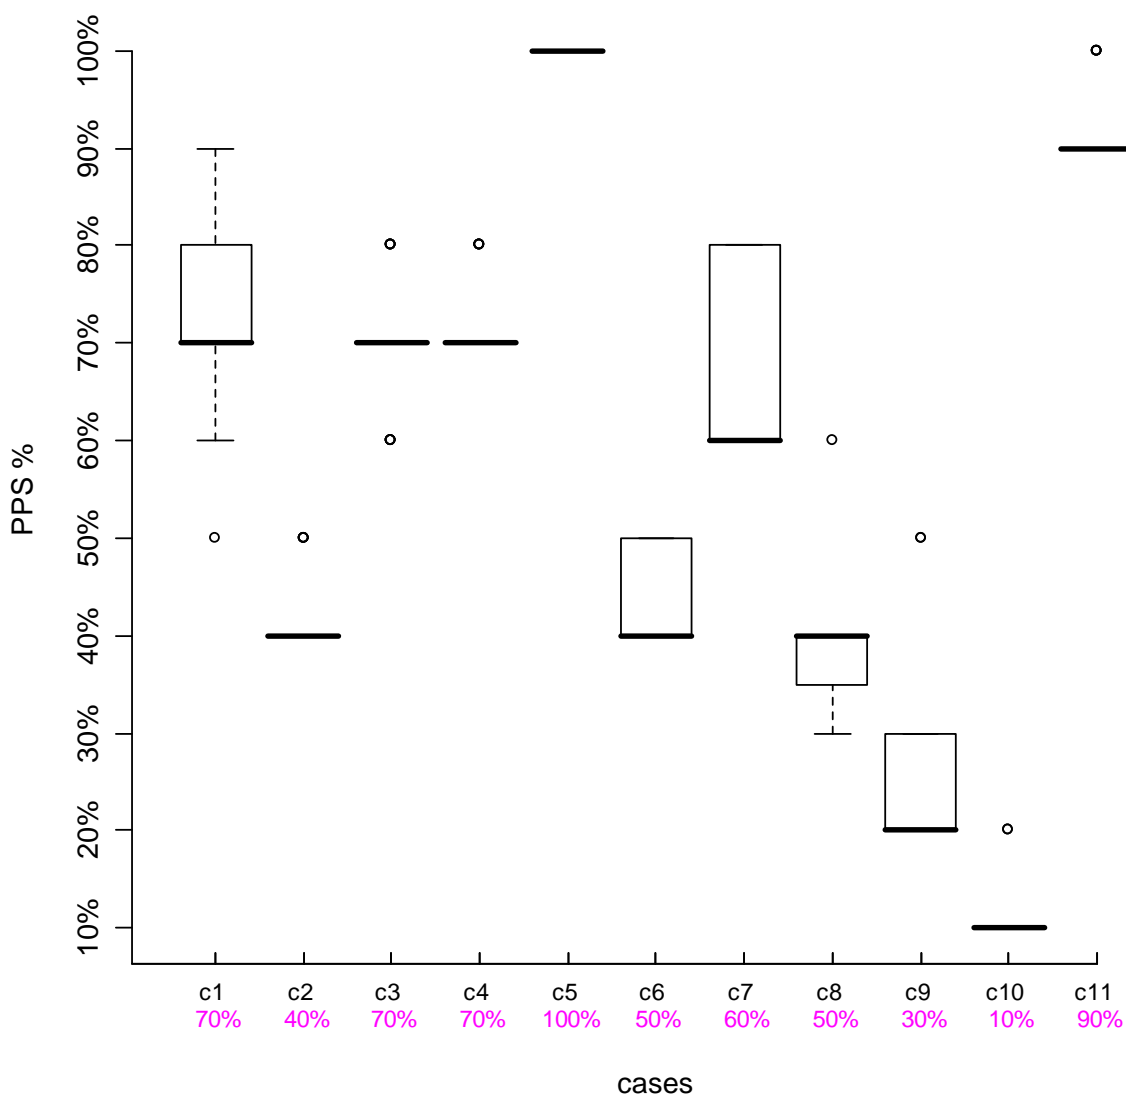

Supplement: MOESM3 [file 9517982]
